# Supplementary material
Source: PubMed Central journal article supplement (PMC5773748)
Supplement: mmc1.pdf [file mmc1.pdf]

**Biophysical Journal, Volume 114**

**Supplemental Information**

**Decrypting the Heat Activation Mechanism of TRPV1 Channel by Molecular Dynamics Simulation**

**Han Wen and Wenjun Zheng**

## Supporting Information

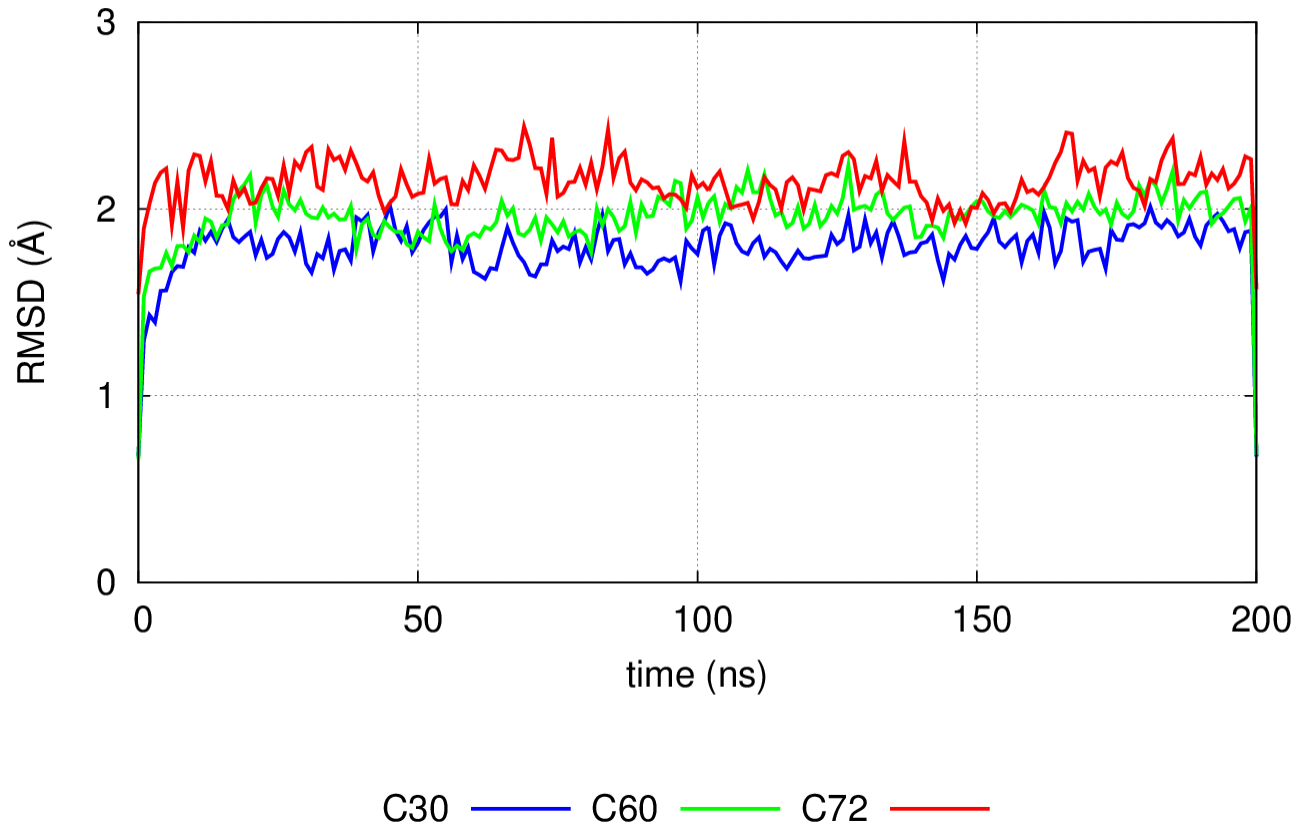

**Figure S1.** RMSD (relative to the initial TRPV1 core structure) for three representative MD trajectories in the C state at 30°C (C30), 60°C (C60), and 72°C (C72). All three RMSD curves stabilize within 50 ns.

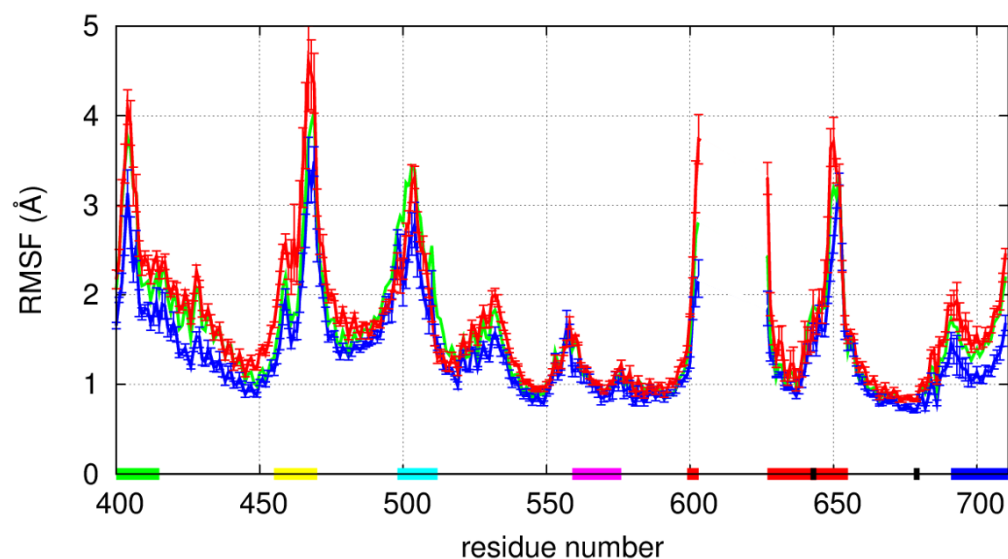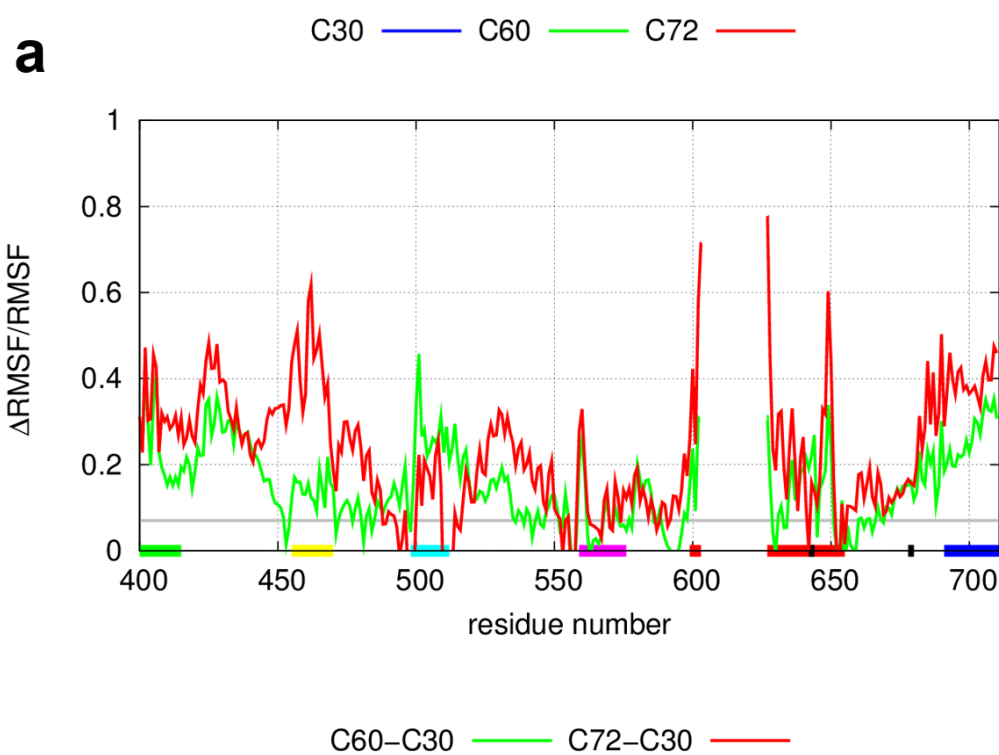

**Figure S2** (a) RMSF profiles at 30°C, 60°C, and 72°C which are labeled C30, C60, and C72. (b) The fractional change in RMSF from C30 to C60, and from C30 to C72, where a gray horizontal line corresponds to an increase of RMSF by 7% due to an unspecific thermal effect. Average RMSF for four equivalent residue positions of the TRPV1 tetramer is shown in (a). Error bars for C30 and C72 are also shown in (a). Most of the observed C30-to-C72 RMSF differences are significant with the blue and red error bars not overlapping. The residue positions corresponding to the MPD linker, the S1-S2 linker, the S2-S3 linker, the S4-S5 linker, the outer pore, the TRP helix, and the upper/lower gate are marked by horizontal bars colored in green, yellow, cyan, purple, red, blue, and black, respectively.

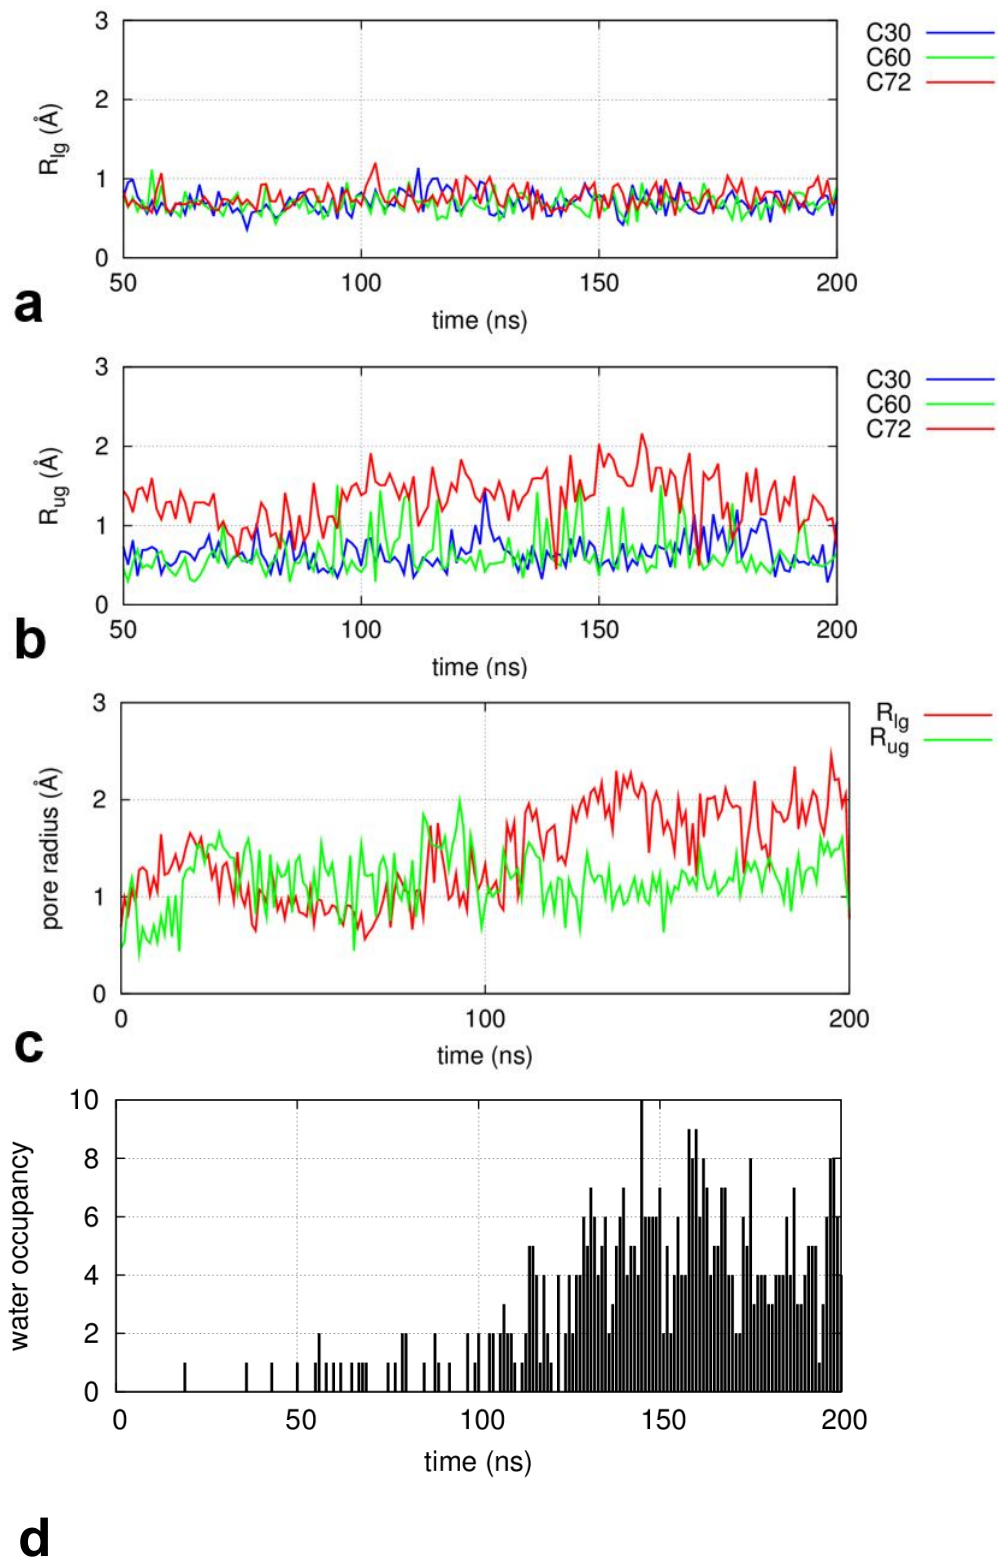

**Figure S3** Channel pore analysis for (a) the lower gate, (b) the upper gate in a representative WT trajectory (blue: 30°C, green: 60°C, and red: 72°C), and (c) both lower gate (red) and upper gate (green) in a representative mutant trajectory. (d) shows the water occupancy near the lower gate (within 2 Å of I679 in z coordinate) for the representative mutant trajectory.

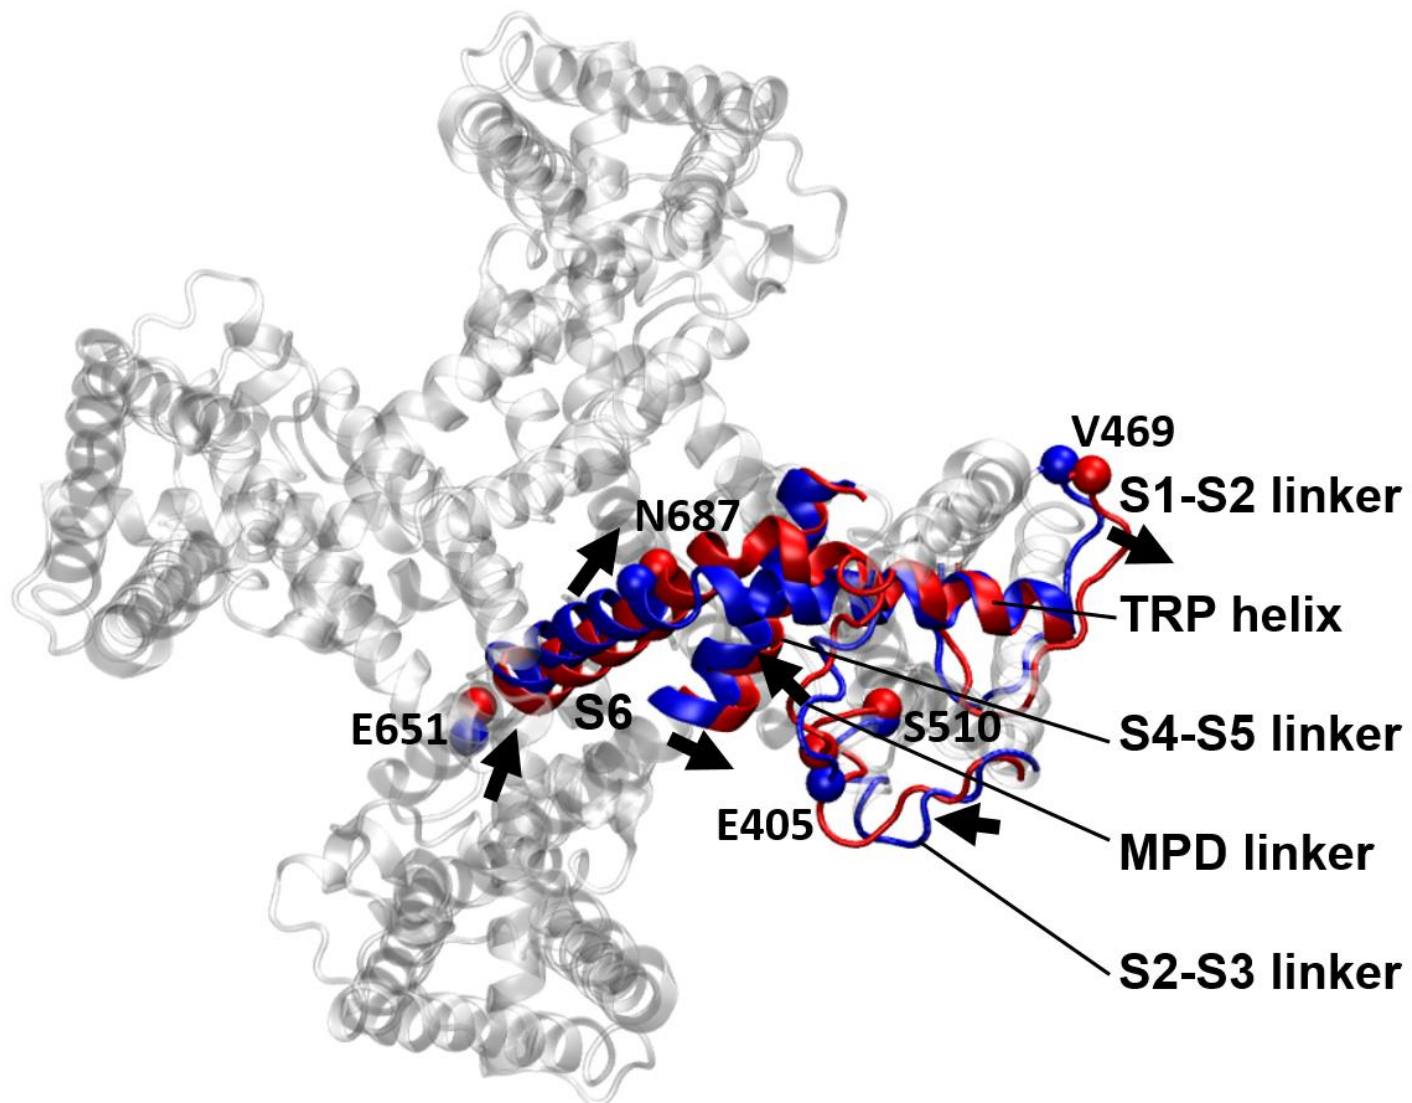

**Figure S4.** Conformational changes from the closed structure (blue) to the open structure (red) of core TRPV1 (residues 400-710) in the bottom view. For clarity, only the MPD linker, the S1-S2 linker, the S2-S3 linker, the S4-S5 linker, the S6 helix, and the TRP helix of a representative subunit are colored while the rest is in gray. Marker residues for key domains (E405, V469, S510, E651, and N687) are labeled and shown as balls. Domain motions are indicated by black arrows.

**Table S1.** Gating-associated changes in nonbonded energy within protein, and between protein and membrane/water.

| interacting components | electrostatic energy change (kcal/mol) |                       |                       | vdW energy change (kcal/mol) |                     |                     |
|------------------------|----------------------------------------|-----------------------|-----------------------|------------------------------|---------------------|---------------------|
|                        |                                        |                       |                       |                              |                     |                     |
| protein-water          | 5978±509 <sup>1</sup>                  | 4350±446 <sup>2</sup> | 5452±429 <sup>3</sup> | -98±61 <sup>1</sup>          |                     |                     |
| protein-membrane       | -1347±118                              |                       |                       | -528±20                      |                     |                     |
| intra-protein          | -3706±219                              |                       |                       | 157±64                       | 294±30 <sup>2</sup> | 472±34 <sup>3</sup> |
| intra-ICD              | -2253±197                              |                       |                       | 150±38                       |                     |                     |
| intra-TMD              | -721±81                                |                       |                       | -8±33                        |                     |                     |

<sup>1</sup>. Energy change from 0 ns to 200 ns in the mutant simulations.

<sup>2</sup>. Energy change from 30°C to 60°C in the WT simulations.

<sup>3</sup>. Energy change from 30°C to 72°C in the WT simulations.

**Table S2.** Top-5% residue positions with the most loss of protein-water HBs.

| residue name and id    |  | change in protein-water HB count |                        |
|------------------------|--|----------------------------------|------------------------|
|                        |  | WT                               | mutant                 |
| from 30°C to 60°C      |  | from 30°C to 72°C                | from 0 ns to 200 ns    |
| GLU391 -1.6±0.8        |  | <b>GLU570</b> -2.5±0.5           | <b>GLU570</b> -3.9±0.6 |
| ARG428 -1.3±0.6        |  | <b>GLU405</b> -2.0±0.8           | ASP388 -3.6±0.7        |
| <b>GLU405</b> -1.2±0.8 |  | ARG428 -1.5±0.6                  | GLU692 -2.9±0.7        |
| <b>GLU570</b> -1.2±0.5 |  | <b>SER403</b> -1.5±0.5           | <b>ARG500</b> -2.6±0.6 |
| THR389 -1.2±0.5        |  | GLU692 -1.4±0.6                  | ASP427 -2.4±0.7        |
| GLU371 -1.1±0.7        |  | ARG367 -1.3±0.6                  | GLU536 -2.4±0.6        |
| GLU648 -1.1±0.8        |  | GLU397 -1.2±0.6                  | GLU371 -2.3±0.8        |
| GLU709 -1.0±0.6        |  | LYS392 -1.1±0.6                  | ASN467 -2.2±0.6        |
| ASP383 -1.0±0.6        |  | ASN419 -1.1±0.5                  | <b>GLU405</b> -2.2±0.8 |
| ARG363 -0.9±0.6        |  | <b>ARG575</b> -1.1±0.5           | ARG363 -2.2±0.6        |
| ASN419 -0.9±0.5        |  | GLU391 -1.1±0.8                  | GLU391 -2.1±0.7        |
| GLU651 -0.9±0.8        |  | ASP427 -1.1±0.7                  | ALA719 -2.1±0.7        |
| ASN467 -0.9±0.6        |  | GLU709 -1.0±0.6                  | GLU600 -2.1±0.7        |
| <b>SER403</b> -0.9±0.5 |  | THR389 -1.0±0.5                  | <b>ARG575</b> -2.1±0.5 |
| ASP427 -0.9±0.7        |  | <b>SER512</b> -1.0±0.3           | <b>ARG557</b> -2.0±0.5 |

Residues on the MPD linker, the S2-S3 linker, and the S4-S5 linker are in bold font.

**Table S3.** Heat-activated changes in nonbonded energy between membrane/water and specific TRPV1 domains.

| interacting components | electrostatic energy change (kcal/mol) |            | vdW energy change (kcal/mol) |            |
|------------------------|----------------------------------------|------------|------------------------------|------------|
|                        | C30-to-C60                             | C30-to-C72 | C30-to-C60                   | C30-to-C72 |
| membrane & MPD         | 34±37                                  | 35±36      | -3±4                         | 6±4        |
| S2-S3 linker           | 63±59                                  | 200±55     | -5±7                         | 20±7       |
| S4-S5 linker           | -112±37                                | -28±29     | -7±5                         | 10±5       |
| outer pore             | -28±33                                 | 2±32       | -8±6                         | 0±6        |
| TRP helix              | 4±26                                   | 32±25      | 2±3                          | 10±3       |
| water & MPD            | 691±148                                | 554±163    | 41±21                        | 45±21      |
| S2-S3 linker           | 81±66                                  | 191±67     | -3±8                         | -6±8       |
| S4-S5 linker           | 202±69                                 | 373±61     | 1±7                          | -8±7       |
| outer pore             | 285±126                                | 71±128     | -5±13                        | -18±13     |
| TRP helix              | 214±85                                 | 342±86     | 6±9                          | 3±9        |

**Movie S1.** Permeation of a water molecule (colored by atom type: red for oxygen and white for hydrogen) through the channel pore.

**Movie S2.** Permeation of a  $K^+$  ion (shown as a blue sphere) through the channel pore.
